# Supplementary material
Source: PubMed Central journal article supplement (PMC7034951)

100 ng

10 ng

1 ng

B2+3

B.PMNs1

B.PMNs2

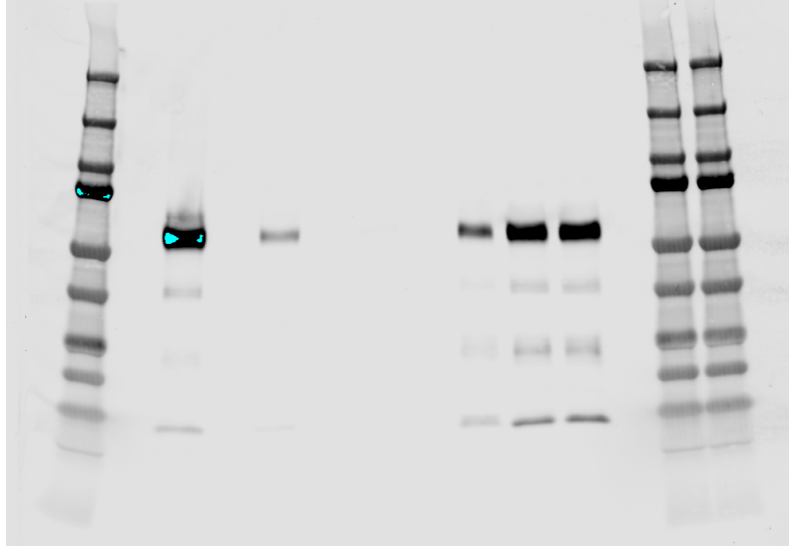

250  
150  
100  
75  
50  
37  
25  
20  
15  
10

Supplement: NIHMS1551324-supplement-Supp__Figure_3.pdf [file NIHMS1551324-supplement-Supp__Figure_3.pdf]

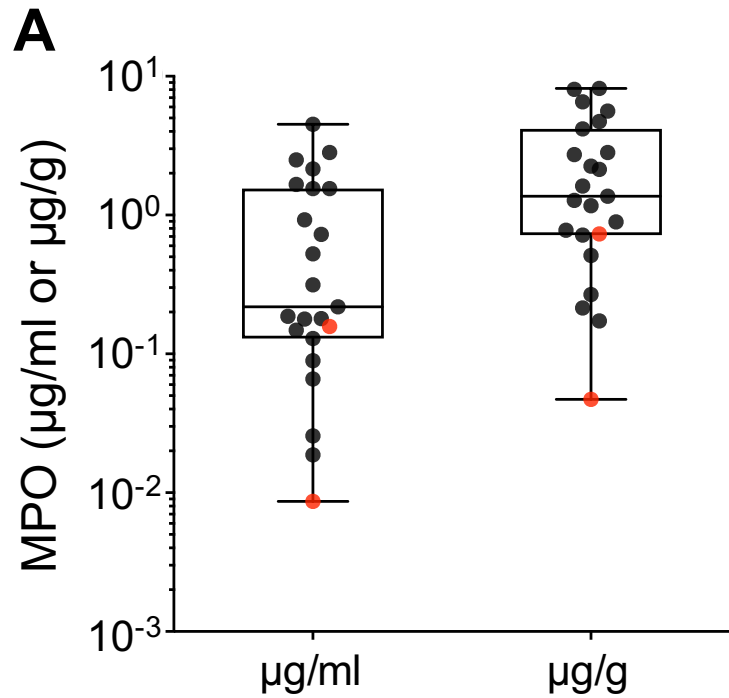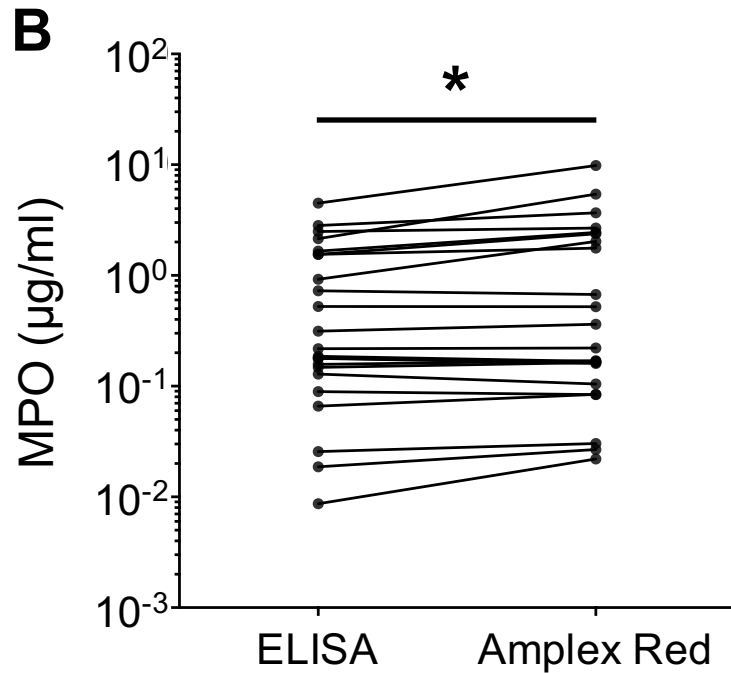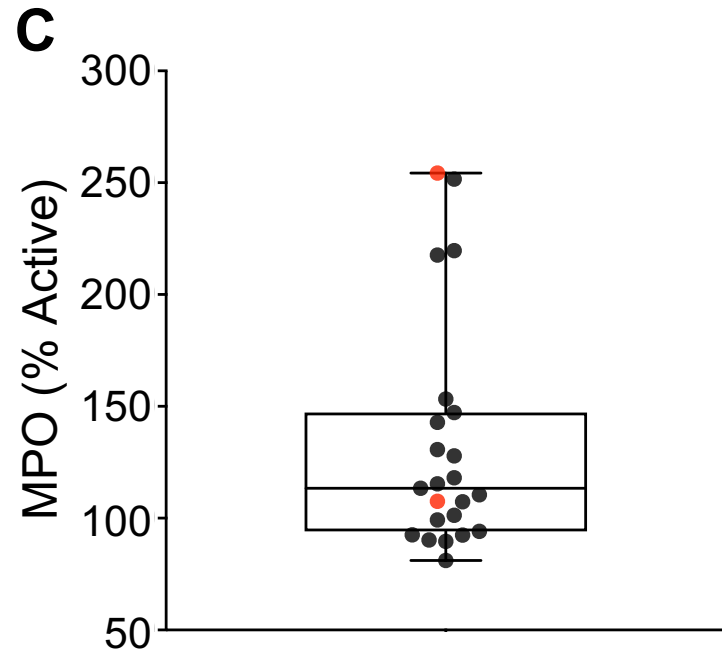

Supplement: NIHMS1551324-supplement-Supp__Figure_4.pdf [file NIHMS1551324-supplement-Supp__Figure_4.pdf]
